# Supplementary material for: Decreased expression of Calpain-9 predicts unfavorable prognosis in patients with gastric cancer
Source: PubMed Central journal article supplement (PMC4941732; doi:10.1038/srep29604), 2016-07-12
Supplement: srep29604-s1.pdf [file srep29604-s1.pdf]

**Decreased expression of Calpain-9 predicts unfavorable prognosis in patients  
with gastric cancer**

Peike Peng<sup>1</sup>, Weicheng Wu<sup>1</sup>, Junjie Zhao<sup>2</sup>, Shushu Song<sup>1</sup>, Xuefei Wang<sup>2</sup>, Dongwei Jia<sup>1</sup>,  
Miaomiao Shao<sup>1</sup>, Mingming Zhang<sup>1</sup>, Lili Li<sup>1</sup>, Lan Wang<sup>1</sup>, Fangfang Duan<sup>3</sup>, Ran Zhao<sup>3</sup>,  
Caiting Yang<sup>1</sup>, Hao Wu<sup>1</sup>, Jie Zhang<sup>3</sup>, Zhenbin Shen<sup>2,\*</sup>, Yuanyuan Ruan<sup>1,\*</sup>, Jianxin Gu<sup>1,3</sup>

## Supplementary Data

**a**

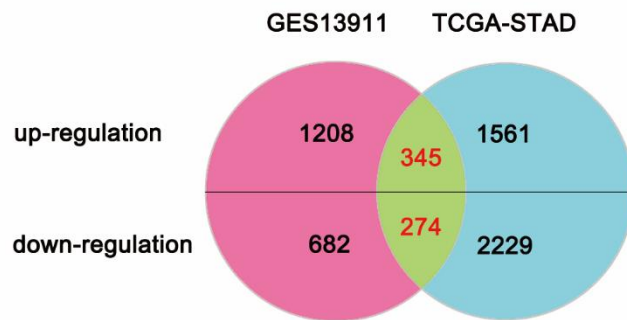

**b**

| GENECARD | GES13911     |             |          | TCGA-STAD   |          |
|----------|--------------|-------------|----------|-------------|----------|
|          | RefSeq       | Fold Change | P-value  | Fold Change | P-value  |
| CAPN1    | NM_001198868 | UD          |          | -1.19729    | 0.017923 |
| CAPN2    | NM_001146068 | UD          |          | -1.26171    | 0.006707 |
| CAPN3    | NM_000070    | UD          |          | 1.240093    | 0.426301 |
| CAPN5    | NM_004055    | -2.07876    | 0.000988 | -1.15271    | 0.314865 |
| CAPN6    | NM_014289    | -2.16138    | 0.001555 | -2.62435    | 0.00262  |
| CAPN7    | NM_014296    | UD          |          | -1.08927    | 0.065896 |
| CAPN8    | NM_001143962 | -6.97844    | 4.13E-08 | 3.038613    | 0.001241 |
| CAPN9    | NM_006615    | -11.5379    | 3.37E-15 | -3.14351    | 0.021873 |
| CAPN10   | NM_023083    | UD          |          | 1.129645    | 0.172529 |
| CAPN11   | NM_007058    | UD          |          | 1.677204    | 0.010713 |
| CAPN12   | NM_144691    | UD          |          | 1.727806    | 0.001975 |
| CAPN13   | NM_144575    | -3.50761    | 2.11E-14 | -1.93066    | 0.259849 |
| CAPN14   | NM_001145122 | UD          |          | -2.44191    | 0.003297 |
| CAPNS1   | NM_001003962 | UD          |          | -1.33652    | 3.55E-05 |
| CAPNS2   | NM_032330    | UD          |          | -2.14082    | 0.004023 |

**Supplementary Figure S1.** Differentially expressed genes in GES13911 dataset and TCGA-STAD dataset. **(a)** Differentially expressed genes in GES13911 dataset (light red) and TCGA-STAD dataset (light blue) with area of overlap showing numbers of genes. **(b)** Differentially expressed members of calpain family in two datasets. UD, undetected.

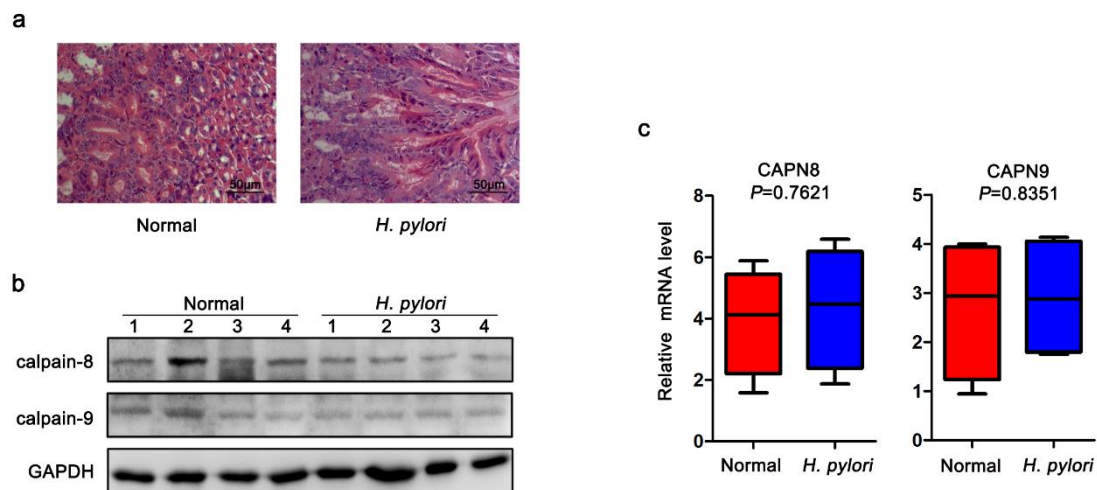

**Supplementary Figure S2.** The expression pattern of calpain-8 and -9 in mouse gastric mucosa with chronic *H. pylori* infection. C57BL/6 mice were inoculated intragastrically with saline control or *H. pylori* SS1 cell suspension. After 3 months, mice from both model group and control group were sacrificed and the stomachs were isolated from the mice for further experiment. **(a)** Representative HE staining in each group. **(b, c)** The protein and the mRNA levels of calpain-8 and calpain-9 in both groups were examined by western blot **(b)** and real-time PCR **(c)**.

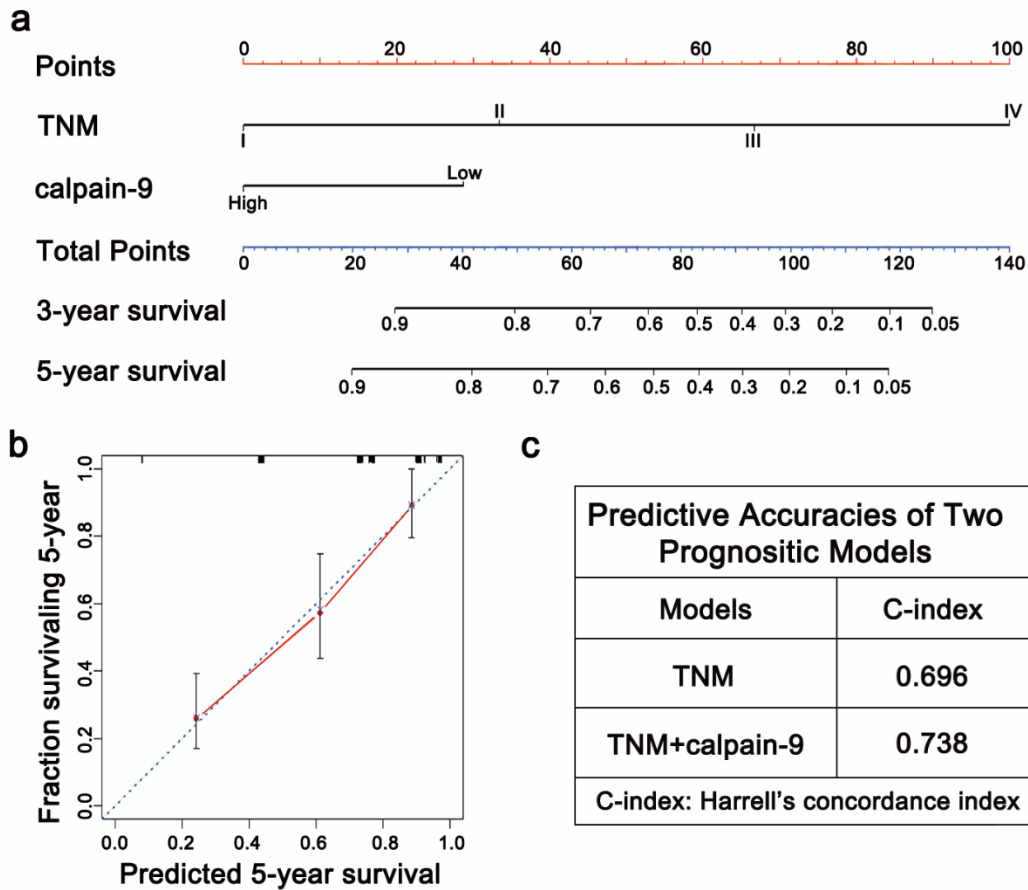

**Supplementary Figure S3.** Nomogram and calibration plot for the prediction of outcome in gastric cancer patients. **(a)** Nomogram for predicting clinical outcomes integrated calpain-9 expression (Low/High) with TNM classification (I/II/III/IV). **(b)** Calibration plot for nomogram predicted 5-year overall survival rate. The nomogram performed well with the ideal model. **(c)** The Harrell's concordance index (C-index) analysis for the generated nomogram or TNM stage alone.

**Supplementary Table S1**

| <b>CO-UPREGULATION</b> |               |                    |                |                    |                  |                 |               |                    |                |                    |                |                    |                  |  |  |
|------------------------|---------------|--------------------|----------------|--------------------|------------------|-----------------|---------------|--------------------|----------------|--------------------|----------------|--------------------|------------------|--|--|
|                        |               | <b>GESI3911</b>    |                |                    | <b>TCGA-STAD</b> |                 |               |                    |                | <b>GESI3911</b>    |                |                    | <b>TCGA-STAD</b> |  |  |
| <b>GENECARD</b>        | <b>RefSeq</b> | <b>Fold Change</b> | <b>P-value</b> | <b>Fold Change</b> | <b>P-value</b>   | <b>GeneCard</b> | <b>RefSeq</b> | <b>Fold Change</b> | <b>P-value</b> | <b>Fold Change</b> | <b>P-value</b> | <b>Fold Change</b> | <b>P-value</b>   |  |  |
| <b>ABHD11</b>          | NM_001145363  | 2.924214           | 9.42E-08       | 2.26832            | 1.43E-09         | <b>CASC5</b>    | NM_144508     | 3.230314           | 6.67E-06       | 5.401207           | 1.63E-14       |                    |                  |  |  |
| <b>ADAMTS2</b>         | NM_014244     | 6.736493           | 1.09E-09       | 4.219735           | 5.16E-07         | <b>CBFB</b>     | NM_001755     | 2.333418           | 1.4E-05        | 2.121174           | 7.39E-19       |                    |                  |  |  |
| <b>ADAP1</b>           | NM_001284308  | 2.505995           | 9.42E-07       | 2.258095           | 1.8E-10          | <b>CCL15</b>    | NM_004167     | 2.735488           | 0.017161       | 6.319715           | 1.54E-05       |                    |                  |  |  |
| <b>AGMAT</b>           | NM_024758     | 2.727213           | 0.000154       | 3.874587           | 3.3E-09          | <b>CCL18</b>    | NM_002988     | 2.825814           | 0.000146       | 2.822753           | 0.005543       |                    |                  |  |  |
| <b>ANLN</b>            | NM_001284301  | 4.292346           | 1.9E-07        | 4.916372           | 5.53E-21         | <b>CCL20</b>    | NM_001130046  | 2.198882           | 0.010381       | 4.402342           | 0.000641       |                    |                  |  |  |
| <b>APOEC3B</b>         | NM_001270411  | 2.296684           | 0.000859       | 3.485333           | 7.95E-06         | <b>CCL3</b>     | NM_001001437  | 5.935226           | 7.59E-08       | 5.112738           | 5.37E-09       |                    |                  |  |  |
| <b>APOC1</b>           | NM_001645     | 4.134493           | 1.55E-06       | 13.47198           | 5.75E-12         | <b>CCL4</b>     | NM_002984     | 3.837024           | 2.92E-07       | 2.086886           | 0.001465       |                    |                  |  |  |
| <b>APOE</b>            | NM_000041     | 2.925817           | 0.000154       | 3.996079           | 1.02E-11         | <b>CCNA2</b>    | NM_001237     | 3.07355            | 5.32E-06       | 3.649698           | 4.4E-15        |                    |                  |  |  |
| <b>AQP9</b>            | NM_020980     | 2.016172           | 0.000191       | 2.728723           | 0.000995         | <b>CCNB1</b>    | NM_031966     | 4.275911           | 6.71E-07       | 3.503285           | 5.09E-16       |                    |                  |  |  |
| <b>ARHGAP8</b>         | NM_001017526  | 2.080339           | 2.16E-06       | 5.344696           | 2.99E-14         | <b>CCNB2</b>    | NM_004701     | 3.418729           | 1.96E-06       | 5.212058           | 5.42E-17       |                    |                  |  |  |
| <b>ARSE</b>            | NM_000047     | 2.967454           | 1.89E-05       | 3.704678           | 0.000673         | <b>CCNE1</b>    | NM_001238     | 2.884383           | 5.12E-05       | 3.524472           | 5.08E-06       |                    |                  |  |  |
| <b>ASCL2</b>           | NM_005170     | 3.034045           | 0.000334       | 5.350419           | 0.000177         | <b>CCNE2</b>    | NM_004702     | 3.115698           | 3.36E-07       | 2.765888           | 1.16E-09       |                    |                  |  |  |
| <b>ASPM</b>            | NM_001206846  | 8.232866           | 3.25E-08       | 8.70911            | 3.61E-20         | <b>CDC20</b>    | NM_001255     | 5.031787           | 1.31E-07       | 5.392867           | 1.03E-15       |                    |                  |  |  |
| <b>ASPN</b>            | NM_001193335  | 5.543612           | 5.23E-08       | 2.555708           | 0.002105         | <b>CDC25B</b>   | NM_001287516  | 4.237617           | 4.42E-09       | 2.541958           | 2.41E-13       |                    |                  |  |  |
| <b>ATAD2</b>           | NM_014109     | 4.176485           | 5.17E-10       | 3.858014           | 3.65E-20         | <b>CDCA2</b>    | NM_152562     | 3.245496           | 4.71E-07       | 8.003031           | 7.71E-17       |                    |                  |  |  |
| <b>ATP11A</b>          | NM_015205     | 3.53325            | 1.19E-09       | 3.342512           | 4.17E-23         | <b>CDCA3</b>    | NM_031299     | 2.884838           | 1.46E-06       | 2.469232           | 8.71E-09       |                    |                  |  |  |
| <b>AURKA</b>           | NM_003600     | 2.852832           | 8.92E-07       | 4.428368           | 3.62E-14         | <b>CDCA5</b>    | NM_080668     | 3.82866            | 4.34E-10       | 4.92196            | 1.28E-15       |                    |                  |  |  |
| <b>AURKB</b>           | NM_001256834  | 3.364727           | 5.34E-08       | 6.366631           | 4.61E-15         | <b>CDCA7</b>    | NM_031942     | 3.070157           | 8.33E-06       | 3.972676           | 9.42E-13       |                    |                  |  |  |
| <b>BAMBI</b>           | NM_012342     | 2.066666           | 0.010138       | 3.411141           | 0.000202         | <b>CDCA8</b>    | NM_001256875  | 2.620631           | 5.14E-07       | 4.687398           | 7.58E-17       |                    |                  |  |  |
| <b>BATF2</b>           | NM_138456     | 3.367119           | 3.47E-07       | 2.591482           | 4.37E-05         | <b>CDH11</b>    | NM_001797     | 2.472463           | 8.79E-06       | 2.483083           | 8.95E-07       |                    |                  |  |  |
| <b>BCAT1</b>           | NM_001178091  | 2.120737           | 0.000332       | 2.209944           | 0.000595         | <b>CDH17</b>    | NM_001144663  | 4.595644           | 0.020334       | 5.164161           | 0.002405       |                    |                  |  |  |
| <b>BCL2A1</b>          | NM_001114735  | 4.799473           | 5.49E-07       | 2.52237            | 3.47E-05         | <b>CDK1</b>     | NM_001130829  | 4.627426           | 6.49E-08       | 5.909384           | 2.57E-20       |                    |                  |  |  |

|                |              |          |          |          |          |                |              |          |          |          |          |
|----------------|--------------|----------|----------|----------|----------|----------------|--------------|----------|----------|----------|----------|
| <b>BGN</b>     | NM_001711    | 6.679762 | 8.94E-12 | 5.280199 | 1.16E-24 | <b>CDKN3</b>   | NM_001130851 | 4.643145 | 6.32E-07 | 3.289217 | 1.7E-11  |
| <b>BID</b>     | NM_001196    | 3.173162 | 4.76E-09 | 2.257933 | 1.9E-17  | <b>CEACAM6</b> | NM_002483    | 4.389772 | 0.011388 | 3.253635 | 0.001418 |
| <b>BIRC5</b>   | NM_001012270 | 3.966814 | 9.81E-07 | 6.123536 | 4.76E-14 | <b>CENPA</b>   | NM_001042426 | 4.417323 | 7.48E-07 | 6.888127 | 2.57E-17 |
| <b>BOP1</b>    | NM_015201    | 3.414464 | 1.73E-08 | 2.103191 | 8.73E-06 | <b>CENPF</b>   | NM_016343    | 4.292358 | 3.34E-09 | 7.296919 | 2.71E-24 |
| <b>BRIP1</b>   | NM_032043    | 2.344197 | 2.73E-05 | 4.102425 | 2.56E-14 | <b>CENPK</b>   | NM_001267038 | 2.094702 | 0.000303 | 4.364635 | 1.03E-17 |
| <b>BUB1</b>    | NM_001278616 | 6.664866 | 1.33E-09 | 8.333946 | 9.72E-20 | <b>CENPL</b>   | NM_001127181 | 2.167    | 1.18E-08 | 2.196732 | 9.66E-15 |
| <b>BUB1B</b>   | NM_001211    | 5.443674 | 1.46E-08 | 7.549649 | 5.15E-19 | <b>CENPN</b>   | NM_001100624 | 3.27177  | 3.13E-07 | 2.016219 | 9.67E-11 |
| <b>BYSL</b>    | NM_004053    | 2.165501 | 1.56E-07 | 2.004422 | 3.49E-10 | <b>CENPW</b>   | NM_001012507 | 3.308516 | 2.4E-07  | 2.205129 | 3.14E-08 |
| <b>C2</b>      | NM_000063    | 2.385272 | 2.86E-05 | 3.086199 | 4.49E-10 | <b>CEP55</b>   | NM_001127182 | 4.790774 | 2.2E-08  | 7.198446 | 6.16E-21 |
| <b>C2CD4A</b>  | NM_207322    | 3.96148  | 9.8E-05  | 7.482272 | 1.02E-06 | <b>CHD7</b>    | NM_017780    | 2.070526 | 1.25E-08 | 2.013424 | 1.22E-11 |
| <b>CAD</b>     | NM_004341    | 2.728328 | 2.34E-09 | 2.208786 | 3.91E-18 | <b>CHEK1</b>   | NM_001114121 | 2.641073 | 2.16E-07 | 2.483052 | 3.97E-12 |
| <b>CHI3L1</b>  | NM_001276    | 13.06002 | 1.54E-10 | 6.449728 | 1.62E-06 | <b>DKC1</b>    | NM_001142463 | 2.381638 | 2.73E-08 | 2.319775 | 4.81E-21 |
| <b>CKAP2</b>   | NM_001098525 | 4.594348 | 3.08E-09 | 2.858082 | 1.05E-15 | <b>DLEU2</b>   | NR_002612    | 2.975944 | 1.07E-09 | 2.709766 | 1.27E-10 |
| <b>CKS1B</b>   | NM_001826    | 3.157957 | 1.8E-10  | 2.372106 | 2.17E-13 | <b>DLGAP5</b>  | NM_001146015 | 4.005429 | 5.3E-07  | 7.39488  | 5.16E-18 |
| <b>CKS2</b>    | NM_001827    | 4.040368 | 9.71E-09 | 3.62889  | 1.67E-15 | <b>DNMT1</b>   | NM_001130823 | 2.300448 | 6.03E-08 | 2.170021 | 8.38E-20 |
| <b>CLDN1</b>   | NM_021101    | 3.088305 | 5.95E-07 | 8.856234 | 2.34E-11 | <b>DPY19L1</b> | NM_015283    | 2.060158 | 1.2E-05  | 2.41793  | 6.43E-15 |
| <b>CLDN2</b>   | NM_001171092 | 5.830947 | 8.41E-07 | 7.261114 | 0.000969 | <b>DSCC1</b>   | NM_024094    | 2.687043 | 5.24E-09 | 3.607865 | 3.33E-14 |
| <b>CLDN3</b>   | NM_001306    | 6.739877 | 0.000601 | 13.60762 | 1.19E-05 | <b>DTL</b>     | NM_001286229 | 3.646682 | 1.49E-07 | 5.35109  | 3.45E-18 |
| <b>CLDN4</b>   | NM_001305    | 3.445196 | 9.93E-06 | 5.672885 | 1.75E-17 | <b>E2F3</b>    | NM_001243076 | 3.026753 | 2.63E-10 | 2.523584 | 1.28E-20 |
| <b>CLDN7</b>   | NM_001185022 | 7.39496  | 1.56E-06 | 4.797796 | 9.35E-18 | <b>E2F7</b>    | NM_203394    | 3.022907 | 1.19E-05 | 8.079218 | 2.53E-16 |
| <b>CLRN3</b>   | NM_152311    | 3.734395 | 0.01334  | 7.80794  | 2.84E-05 | <b>ECT2</b>    | NM_001258315 | 4.035155 | 3.59E-09 | 5.670458 | 1.84E-27 |
| <b>COL10A1</b> | NM_000493    | 5.20834  | 1.51E-06 | 91.867   | 1.69E-08 | <b>EFNA2</b>   | NM_001405    | 2.057359 | 0.024448 | 3.443249 | 0.001197 |
| <b>COL11A1</b> | NM_001190709 | 5.968203 | 1.74E-06 | 71.32991 | 1.02E-07 | <b>EFNA3</b>   | NM_004952    | 2.650109 | 1.18E-05 | 2.852388 | 0.000137 |
| <b>COL12A1</b> | NM_004370    | 5.7625   | 7.92E-11 | 3.188111 | 4.15E-12 | <b>ENC1</b>    | NM_001256574 | 3.261228 | 1.99E-06 | 4.484416 | 1.05E-27 |
| <b>COL1A1</b>  | NM_000088    | 2.240905 | 6.18E-09 | 7.582504 | 8.4E-31  | <b>EPHB2</b>   | NM_004442    | 2.957207 | 1.12E-06 | 7.488979 | 3.06E-11 |
| <b>COL1A2</b>  | NM_000089    | 3.215883 | 5.73E-07 | 3.595068 | 5.21E-16 | <b>EPST11</b>  | NM_001002264 | 3.754272 | 5.54E-08 | 2.327097 | 3.19E-06 |

|                |              |          |          |          |          |               |              |          |          |          |          |
|----------------|--------------|----------|----------|----------|----------|---------------|--------------|----------|----------|----------|----------|
| <b>COL3A1</b>  | NM_000090    | 2.599424 | 0.000109 | 3.940762 | 4.94E-17 | <b>ETV4</b>   | NM_001079675 | 2.0406   | 2.9E-05  | 8.286438 | 4.84E-10 |
| <b>COL4A1</b>  | NM_001845    | 3.528854 | 1.02E-12 | 3.109484 | 4.38E-22 | <b>EZH2</b>   | NM_001203247 | 3.450661 | 2.77E-07 | 3.932657 | 1.27E-16 |
| <b>COL5A1</b>  | NM_000093    | 2.797919 | 2.89E-06 | 2.882106 | 1.13E-11 | <b>F2R</b>    | NM_001992    | 2.545362 | 4.84E-06 | 2.91753  | 2.88E-17 |
| <b>COL5A2</b>  | NM_000393    | 4.217456 | 4.28E-10 | 3.880336 | 1.95E-18 | <b>FAM60A</b> | NM_001135811 | 2.198259 | 4.17E-11 | 2.527959 | 3.68E-19 |
| <b>COL6A3</b>  | NM_004369    | 4.697924 | 1.13E-09 | 2.447632 | 1.52E-09 | <b>FAM72A</b> | NM_001100910 | 6.468103 | 6.86E-08 | 9.663502 | 2.72E-23 |
| <b>COL8A1</b>  | NM_001850    | 17.61766 | 1.27E-11 | 3.297011 | 0.00152  | <b>FAM83B</b> | NM_001010872 | 2.117077 | 0.000307 | 2.67038  | 8.8E-05  |
| <b>CSE1L</b>   | NM_001256135 | 3.429257 | 4.66E-10 | 2.095894 | 1.29E-16 | <b>FAM83H</b> | NM_198488    | 2.399721 | 1.17E-07 | 3.892665 | 5.08E-18 |
| <b>CST1</b>    | NM_001898    | 6.323367 | 3.9E-06  | 231.2299 | 3.66E-08 | <b>FANCD2</b> | NM_001018115 | 2.843492 | 4.69E-08 | 4.18265  | 1.34E-16 |
| <b>CST4</b>    | NM_001899    | 2.047271 | 2.53E-05 | 21.77252 | 1.2E-11  | <b>FANCI</b>  | NM_001113378 | 2.540645 | 1.2E-06  | 4.294069 | 2.25E-20 |
| <b>CTHRC1</b>  | NM_001256099 | 10.89702 | 6.35E-09 | 9.680546 | 6.85E-12 | <b>FBXO5</b>  | NM_001142522 | 3.108851 | 2.7E-07  | 2.012996 | 1.85E-10 |
| <b>CXCL1</b>   | NM_001511    | 5.082205 | 3.63E-07 | 8.322332 | 3.64E-07 | <b>FCGR2A</b> | NM_001136219 | 2.727427 | 1.72E-05 | 2.213804 | 1.02E-06 |
| <b>CXCL10</b>  | NM_001565    | 8.330608 | 2.79E-08 | 4.4084   | 5.07E-05 | <b>FCGR3A</b> | NM_000569    | 4.617561 | 6.23E-06 | 4.9443   | 7.4E-09  |
| <b>CXCL11</b>  | NM_005409    | 4.757898 | 4.16E-05 | 5.902119 | 2.81E-06 | <b>FEN1</b>   | NM_004111    | 2.778399 | 8.21E-08 | 2.107377 | 8.47E-13 |
| <b>CXCL16</b>  | NM_001100812 | 2.3281   | 2.3E-05  | 2.351059 | 3.03E-14 | <b>FERMT1</b> | NM_017671    | 2.040345 | 3.92E-05 | 3.532326 | 3.62E-12 |
| <b>CXCL9</b>   | NM_002416    | 9.40643  | 2.03E-07 | 5.664222 | 2.39E-06 | <b>FIGNL1</b> | NM_001042762 | 3.852637 | 2.94E-08 | 2.187696 | 2.88E-10 |
| <b>DBF4</b>    | NM_006716    | 2.969358 | 4.35E-09 | 3.253791 | 1.23E-16 | <b>FMNL2</b>  | NM_001004417 | 2.429822 | 1.33E-10 | 2.208198 | 2.51E-11 |
| <b>DCAF13</b>  | NM_015420    | 2.477539 | 6.48E-12 | 2.213989 | 7.34E-15 | <b>FN1</b>    | NM_002026    | 6.707603 | 1.71E-10 | 2.380318 | 3.83E-06 |
| <b>DDX21</b>   | NM_001256910 | 2.351493 | 5.59E-10 | 2.148692 | 1.26E-19 | <b>FNDC1</b>  | NM_032532    | 9.524289 | 7.42E-09 | 11.24006 | 3.57E-06 |
| <b>DEPDC1</b>  | NM_001114120 | 4.098693 | 2.49E-07 | 5.594769 | 1.53E-14 | <b>FOXC1</b>  | NM_001453    | 2.262347 | 2.68E-05 | 2.168476 | 0.002759 |
| <b>DEPDC1B</b> | NM_001145208 | 6.434735 | 2.58E-08 | 5.793657 | 7.77E-16 | <b>GAS2L3</b> | NM_174942    | 2.614119 | 0.000116 | 2.041285 | 9.82E-06 |
| <b>GBP5</b>    | NM_001134486 | 3.134768 | 0.000171 | 2.894456 | 0.000209 | <b>KIF18B</b> | NM_001080443 | 4.148463 | 3.56E-09 | 11.01718 | 1.85E-19 |
| <b>GDF15</b>   | NM_004864    | 6.18039  | 1.22E-08 | 11.0361  | 5.68E-13 | <b>KIF20A</b> | NM_005733    | 3.747087 | 2.84E-08 | 6.861093 | 6.46E-19 |
| <b>GDPD5</b>   | NM_030792    | 2.145985 | 2.18E-05 | 3.255481 | 9.9E-08  | <b>KIF20B</b> | NM_001284259 | 2.144407 | 1.22E-08 | 2.724888 | 1.67E-16 |
| <b>GGH</b>     | NM_003878    | 4.604421 | 2.96E-09 | 2.875953 | 2.03E-06 | <b>KIF23</b>  | NM_001281301 | 5.251066 | 3.72E-09 | 6.352478 | 1.13E-19 |
| <b>GIN51</b>   | NM_021067    | 4.445216 | 1.63E-07 | 4.283423 | 6.49E-15 | <b>KIF2C</b>  | NM_006845    | 5.75107  | 9.92E-10 | 4.969033 | 1.49E-15 |
| <b>GIN52</b>   | NM_016095    | 3.536195 | 5.19E-07 | 2.618943 | 2.65E-08 | <b>KIF4A</b>  | NM_012310    | 4.089203 | 5.5E-08  | 7.305185 | 2.96E-17 |

|                 |              |          |          |          |          |                 |              |          |          |          |          |
|-----------------|--------------|----------|----------|----------|----------|-----------------|--------------|----------|----------|----------|----------|
| <b>GPRC5A</b>   | NM_003979    | 3.730644 | 1.66E-05 | 4.095404 | 2.16E-12 | <b>KPNA2</b>    | NM_002266    | 2.366603 | 1.13E-07 | 2.694287 | 2.81E-21 |
| <b>GTPBP4</b>   | NM_012341    | 2.386963 | 8.95E-08 | 2.02624  | 7.91E-17 | <b>KRT7</b>     | NM_005556    | 3.066259 | 0.001323 | 5.346349 | 0.000973 |
| <b>GTSE1</b>    | NM_016426    | 2.242315 | 7.86E-08 | 5.982458 | 6.03E-17 | <b>LAMP3</b>    | NM_014398    | 2.925608 | 5.14E-06 | 4.323844 | 6.24E-10 |
| <b>GZMB</b>     | NM_004131    | 2.121942 | 0.005893 | 2.003763 | 0.004749 | <b>LEF1</b>     | NM_001130713 | 2.511854 | 1.02E-05 | 2.654133 | 1.03E-08 |
| <b>HEATR1</b>   | NM_018072    | 2.711348 | 2.07E-10 | 2.207646 | 8.46E-21 | <b>LGR5</b>     | NM_001277226 | 3.882192 | 8.86E-06 | 6.600057 | 0.000257 |
| <b>HELLS</b>    | NM_001289067 | 2.133923 | 1.55E-05 | 5.624619 | 1.62E-20 | <b>LIF</b>      | NM_001257135 | 2.600416 | 1.1E-06  | 4.76182  | 6.54E-11 |
| <b>HJURP</b>    | NM_001282962 | 3.024597 | 5.63E-07 | 8.253621 | 4.16E-18 | <b>LIPG</b>     | NM_006033    | 3.020232 | 4.95E-06 | 4.878578 | 1.07E-08 |
| <b>HMGA1</b>    | NM_002131    | 2.323181 | 1.88E-08 | 2.323776 | 3.17E-10 | <b>LMNB1</b>    | NM_001198557 | 2.684858 | 2.33E-05 | 3.27753  | 4.86E-18 |
| <b>HMGB3</b>    | NM_005342    | 3.232659 | 1.35E-10 | 3.366064 | 4.16E-15 | <b>LOX</b>      | NM_001178102 | 2.621134 | 6.48E-05 | 2.255853 | 1.42E-05 |
| <b>HMMR</b>     | NM_001142556 | 3.861096 | 5.33E-07 | 7.900792 | 3.1E-18  | <b>LOXL2</b>    | NM_002318    | 2.979989 | 1.06E-07 | 2.641822 | 8.08E-12 |
| <b>HOXA10</b>   | NM_018951    | 7.526424 | 4.98E-07 | 21.79083 | 2.58E-07 | <b>LY6E</b>     | NM_001127213 | 7.040238 | 1.45E-10 | 2.326483 | 7.96E-09 |
| <b>HOXB6</b>    | NM_018952    | 2.045351 | 0.000189 | 2.892711 | 0.000231 | <b>MACC1</b>    | NM_182762    | 2.032916 | 0.007213 | 4.215677 | 1.14E-11 |
| <b>HOXB7</b>    | NM_004502    | 6.697906 | 9.29E-09 | 2.714296 | 5.79E-05 | <b>MAD2L1</b>   | NM_002358    | 2.507857 | 4.98E-06 | 3.704309 | 3.55E-13 |
| <b>HOXC6</b>    | NM_004503    | 6.435511 | 5.95E-09 | 5.8771   | 1.38E-07 | <b>MAGEA3</b>   | NM_005362    | 6.1883   | 0.000108 | 15.1235  | 0.000699 |
| <b>HPSE</b>     | NM_001098540 | 3.825021 | 4.46E-07 | 2.502198 | 3.32E-06 | <b>MAGEA6</b>   | NM_005363    | 6.816183 | 0.000105 | 16.0619  | 0.000778 |
| <b>HSPD1</b>    | NM_002156    | 3.051192 | 2.88E-05 | 2.430965 | 1.01E-20 | <b>MARVELD3</b> | NM_001017967 | 2.769418 | 1.87E-05 | 3.997069 | 7.86E-11 |
| <b>HSPH1</b>    | NM_001286503 | 2.171233 | 0.000139 | 2.160286 | 1.21E-12 | <b>MASTL</b>    | NM_001172303 | 2.552586 | 3.98E-08 | 2.028942 | 6.03E-12 |
| <b>IFI30</b>    | NM_005027    | 2.506851 | 3.61E-08 | 2.962242 | 3.92E-17 | <b>MCM2</b>     | NM_004526    | 3.965328 | 7.17E-10 | 2.781493 | 1.19E-15 |
| <b>IFI44L</b>   | NM_006820    | 3.085477 | 0.00016  | 2.087325 | 0.020361 | <b>MCM4</b>     | NM_005914    | 2.636135 | 1.25E-06 | 2.643379 | 4.18E-15 |
| <b>IFI6</b>     | NM_002038    | 4.704781 | 2.14E-07 | 2.728621 | 2.61E-07 | <b>MCM7</b>     | NM_001278595 | 2.570267 | 1.34E-08 | 2.096013 | 4.65E-12 |
| <b>IGF2BP2</b>  | NM_001007225 | 2.288758 | 0.000108 | 4.278749 | 7.38E-12 | <b>MCM8</b>     | NM_001281520 | 2.779435 | 2.74E-07 | 2.429955 | 3.26E-11 |
| <b>IL32</b>     | NM_001012631 | 4.479348 | 7.78E-09 | 3.341924 | 5.45E-13 | <b>MDK</b>      | NM_001012333 | 3.030734 | 7.95E-05 | 2.539128 | 3.33E-10 |
| <b>INHBA</b>    | NM_002192    | 5.970443 | 1.63E-08 | 12.66557 | 1.13E-12 | <b>MELK</b>     | NM_001256685 | 3.52127  | 2.49E-06 | 6.98419  | 3.19E-17 |
| <b>IQGAP3</b>   | NM_178229    | 3.054664 | 6.9E-06  | 7.849868 | 9.06E-23 | <b>MEST</b>     | NM_001253900 | 5.680621 | 4.83E-08 | 4.336111 | 1.35E-13 |
| <b>ITGA2</b>    | NM_002203    | 3.628106 | 4.83E-06 | 2.384338 | 2.54E-08 | <b>MET</b>      | NM_000245    | 2.258564 | 5.23E-07 | 3.493078 | 3.57E-15 |
| <b>KIAA0101</b> | NM_001029989 | 2.525061 | 3.29E-05 | 4.999128 | 1.02E-15 | <b>MFAP2</b>    | NM_001135247 | 9.927048 | 2.84E-11 | 4.024076 | 2.21E-06 |



|               |              |          |          |          |          |                |              |          |          |          |          |
|---------------|--------------|----------|----------|----------|----------|----------------|--------------|----------|----------|----------|----------|
| <b>KIF11</b>  | NM_004523    | 3.420278 | 4.26E-06 | 4.425147 | 3.39E-22 | <b>MICB</b>    | NM_001289160 | 2.917423 | 3.32E-05 | 2.887183 | 3.12E-08 |
| <b>KIF14</b>  | NM_014875    | 5.166789 | 1.1E-09  | 11.2867  | 3.03E-21 | <b>MKI67</b>   | NM_001145966 | 2.540273 | 7.07E-05 | 7.551701 | 3.96E-36 |
| <b>KIF15</b>  | NM_020242    | 2.482955 | 2.44E-08 | 5.715718 | 9.16E-16 | <b>MMP1</b>    | NM_001145938 | 2.407264 | 1.09E-05 | 10.15696 | 1.52E-06 |
| <b>MMP12</b>  | NM_002426    | 9.94366  | 1E-07    | 10.68756 | 3.53E-05 | <b>PARP14</b>  | NM_017554    | 2.432076 | 3.95E-08 | 2.302106 | 3.54E-16 |
| <b>MMP3</b>   | NM_002422    | 7.101636 | 1.85E-07 | 18.1766  | 5.36E-05 | <b>PBK</b>     | NM_001278945 | 4.029626 | 5.35E-07 | 6.713036 | 1.09E-13 |
| <b>MMP7</b>   | NM_002423    | 4.363455 | 6.01E-06 | 15.01665 | 0.000173 | <b>PCNA</b>    | NM_002592    | 2.418145 | 1.51E-07 | 2.260265 | 3.83E-15 |
| <b>MMP9</b>   | NM_004994    | 3.515196 | 1.42E-06 | 5.879531 | 2.53E-08 | <b>PDGFRB</b>  | NM_002609    | 2.047991 | 2.7E-06  | 2.526703 | 1.36E-11 |
| <b>MSH2</b>   | NM_000251    | 3.59782  | 4.21E-11 | 2.147993 | 1.7E-12  | <b>PGM2L1</b>  | NM_173582    | 2.105012 | 2.51E-05 | 3.182025 | 2.94E-15 |
| <b>MSLN</b>   | NM_001177355 | 3.632165 | 0.000105 | 11.96777 | 0.001159 | <b>PIK3AP1</b> | NM_152309    | 3.592364 | 1.09E-07 | 3.884954 | 1.3E-15  |
| <b>MSR1</b>   | NM_002445    | 2.290772 | 1.29E-05 | 3.659696 | 9.05E-07 | <b>PKDCC</b>   | NM_138370    | 5.792373 | 2.08E-06 | 2.569408 | 4.83E-05 |
| <b>MSX2</b>   | NM_002449    | 2.017411 | 0.005027 | 3.237062 | 6.58E-06 | <b>PLA2G7</b>  | NM_001168357 | 5.818132 | 4.62E-09 | 9.132269 | 1.45E-14 |
| <b>MXRA5</b>  | NM_015419    | 2.043933 | 0.00054  | 2.695675 | 2.3E-10  | <b>PLAU</b>    | NM_001145031 | 6.564345 | 6.07E-11 | 3.178416 | 4.66E-11 |
| <b>MYB</b>    | NM_001130172 | 3.390553 | 9.09E-06 | 5.622652 | 1.53E-08 | <b>PLAUR</b>   | NM_001005376 | 2.428433 | 0.000125 | 2.396088 | 4.64E-09 |
| <b>MYBL2</b>  | NM_001278610 | 2.718004 | 7.68E-07 | 9.68512  | 2.81E-21 | <b>PLOD3</b>   | NM_001084    | 2.894064 | 9.5E-11  | 2.537126 | 8.54E-18 |
| <b>MYO1B</b>  | NM_001130158 | 2.191995 | 1.61E-06 | 2.301705 | 2.48E-14 | <b>PLXNA1</b>  | NM_032242    | 2.390765 | 4.85E-09 | 2.096486 | 1.07E-14 |
| <b>NCAPG</b>  | NM_022346    | 2.582104 | 4.15E-07 | 7.267725 | 1.37E-18 | <b>PMAIP1</b>  | NM_021127    | 3.332206 | 1.82E-06 | 2.535922 | 1.7E-06  |
| <b>NCAPG2</b> | NM_001281932 | 2.247396 | 4.88E-06 | 2.78924  | 1.9E-13  | <b>PMEPA1</b>  | NM_001255976 | 3.958864 | 6.01E-08 | 3.367255 | 9.13E-12 |
| <b>NCAPH</b>  | NM_001281710 | 2.003055 | 3.87E-07 | 5.685757 | 7.33E-16 | <b>PNPT1</b>   | NM_033109    | 2.400742 | 1.32E-10 | 2.041405 | 3.38E-14 |
| <b>NDC80</b>  | NM_006101    | 4.469064 | 6.89E-08 | 5.119332 | 6.46E-18 | <b>PODXL</b>   | NM_001018111 | 2.725621 | 1.93E-10 | 2.473951 | 1.36E-17 |
| <b>NEK2</b>   | NM_001204182 | 7.669709 | 9.57E-09 | 7.974781 | 2E-17    | <b>PPAT</b>    | NM_002703    | 2.311421 | 5.63E-06 | 2.508939 | 1.18E-12 |
| <b>NFE2L3</b> | NM_004289    | 6.951775 | 9.04E-12 | 5.796152 | 1.64E-25 | <b>PPP1R1B</b> | NM_001242464 | 3.930879 | 0.000732 | 2.776722 | 0.011245 |
| <b>NID2</b>   | NM_007361    | 4.886446 | 1.05E-10 | 2.531933 | 5.14E-07 | <b>PRC1</b>    | NM_001267580 | 6.061792 | 4.74E-08 | 3.689038 | 1.32E-18 |
| <b>NME1</b>   | NM_000269    | 3.120823 | 1.7E-09  | 2.200601 | 2.26E-12 | <b>PRIM1</b>   | NM_000946    | 2.174002 | 5.21E-07 | 2.051322 | 3.35E-09 |
| <b>NOP2</b>   | NM_001033714 | 2.701912 | 1.05E-09 | 2.229895 | 1.12E-16 | <b>PRIM2</b>   | NM_000947    | 2.168527 | 1.49E-08 | 2.095114 | 6.07E-15 |
| <b>NOTCH3</b> | NM_000435    | 2.719378 | 3.57E-08 | 2.237939 | 3.88E-10 | <b>PRKDC</b>   | NM_001081640 | 2.310228 | 1.46E-08 | 2.118558 | 4.33E-18 |
| <b>NUDCD1</b> | NM_001128211 | 4.352376 | 4.54E-13 | 2.385651 | 3.39E-15 | <b>PRR11</b>   | NM_018304    | 4.312383 | 4.53E-07 | 3.483218 | 1.32E-14 |

|                 |              |          |          |          |          |                  |              |          |          |          |          |
|-----------------|--------------|----------|----------|----------|----------|------------------|--------------|----------|----------|----------|----------|
| <b>NUF2</b>     | NM_031423    | 6.156864 | 1.83E-09 | 7.317485 | 1.61E-18 | <b>PSRC1</b>     | NM_001005290 | 3.216516 | 1.12E-07 | 2.158656 | 5.92E-07 |
| <b>NUP107</b>   | NM_020401    | 2.410373 | 5.28E-08 | 2.122707 | 1.54E-12 | <b>PTTG1</b>     | NM_001282382 | 2.978406 | 6.4E-07  | 2.832096 | 7.22E-11 |
| <b>NUSAP1</b>   | NM_001129897 | 3.469398 | 1.67E-06 | 4.461899 | 3.46E-21 | <b>PUS7</b>      | NM_019042    | 3.952763 | 3.77E-10 | 2.813347 | 1.95E-13 |
| <b>OAS3</b>     | NM_006187    | 2.067578 | 5.99E-05 | 2.217927 | 1.47E-09 | <b>RAD51</b>     | NM_001164269 | 2.253736 | 1.78E-06 | 3.735777 | 1.11E-16 |
| <b>OIP5</b>     | NM_007280    | 4.12922  | 1.4E-07  | 3.755546 | 3.96E-14 | <b>RAD51AP1</b>  | NM_001130862 | 3.826546 | 3.67E-07 | 4.532566 | 2.03E-16 |
| <b>OLFML2B</b>  | NM_015441    | 3.508141 | 5.06E-07 | 3.548199 | 3.57E-07 | <b>RARRES1</b>   | NM_002888    | 6.773479 | 1.62E-05 | 2.460981 | 0.002579 |
| <b>ONECUT2</b>  | NM_004852    | 2.028773 | 0.035025 | 10.89616 | 6.72E-08 | <b>RBL1</b>      | NM_002895    | 2.421893 | 9.49E-08 | 2.253062 | 1.73E-10 |
| <b>OSBPL3</b>   | NM_015550    | 2.300056 | 1.75E-06 | 3.041186 | 1.56E-22 | <b>RCC1</b>      | NM_001048194 | 2.851565 | 1.1E-07  | 7.054448 | 3.27E-14 |
| <b>OSMR</b>     | NM_001168355 | 3.037355 | 1.16E-06 | 2.007331 | 0.000158 | <b>RCC2</b>      | NM_001136204 | 2.394175 | 6.73E-11 | 2.569875 | 6.51E-30 |
| <b>OVOL1</b>    | NM_004561    | 2.292996 | 0.000422 | 3.443731 | 0.00027  | <b>RCN3</b>      | NM_020650    | 2.640665 | 1.05E-05 | 2.170628 | 4.13E-05 |
| <b>P4HA1</b>    | NM_000917    | 2.191808 | 1.96E-05 | 2.005728 | 1.18E-08 | <b>RFC3</b>      | NM_002915    | 3.042734 | 5.33E-07 | 3.13757  | 1.9E-14  |
| <b>PAFAH1B3</b> | NM_001145939 | 2.154829 | 9.88E-08 | 2.115959 | 9.33E-10 | <b>RFC4</b>      | NM_002916    | 2.957937 | 2.17E-07 | 2.115899 | 8.6E-12  |
| <b>RIPK2</b>    | NM_003821    | 2.505711 | 3.21E-08 | 2.370388 | 1E-14    | <b>TFAP2A</b>    | NM_001032280 | 4.457445 | 1.77E-07 | 3.118733 | 0.000553 |
| <b>RPP25</b>    | NM_017793    | 2.226238 | 3.39E-06 | 2.252384 | 1.23E-11 | <b>TGIF1</b>     | NM_001278682 | 3.225332 | 1.85E-14 | 2.016603 | 3.49E-17 |
| <b>RRM2</b>     | NM_001034    | 3.167225 | 1.09E-05 | 5.214598 | 3.97E-21 | <b>THBS2</b>     | NM_003247    | 11.05046 | 6.37E-10 | 5.343186 | 1.97E-08 |
| <b>RTKN</b>     | NM_001015055 | 4.827374 | 4.99E-13 | 2.14348  | 2.34E-11 | <b>THY1</b>      | NM_006288    | 6.141903 | 6.4E-10  | 3.338926 | 9.11E-14 |
| <b>SCML1</b>    | NM_001037535 | 2.445854 | 3.51E-07 | 2.162547 | 3.32E-05 | <b>TIGD1</b>     | NM_145702    | 2.105354 | 2.75E-07 | 2.241432 | 3.97E-10 |
| <b>SERPINA1</b> | NM_000295    | 2.012828 | 0.007314 | 3.547525 | 2.26E-06 | <b>TIMELESS</b>  | NM_003920    | 2.062772 | 1.62E-07 | 3.126608 | 2.44E-18 |
| <b>SERPINB5</b> | NM_002639    | 5.09555  | 0.002027 | 3.975475 | 0.000539 | <b>TIMP1</b>     | NM_003254    | 4.305043 | 5.09E-09 | 2.708027 | 8.43E-15 |
| <b>SERPINE1</b> | NM_000602    | 2.138746 | 0.00048  | 3.596301 | 5.35E-08 | <b>TMEM206</b>   | NM_001198862 | 3.096153 | 1.15E-11 | 2.202759 | 6.05E-17 |
| <b>SERPINH1</b> | NM_001207014 | 10.94461 | 1.99E-14 | 2.605328 | 3.75E-22 | <b>TNFRSF10B</b> | NM_003842    | 2.084648 | 1.94E-07 | 2.50778  | 3.66E-17 |
| <b>SGOL2</b>    | NM_001160033 | 2.891123 | 1.25E-06 | 3.351256 | 2.54E-15 | <b>TNFRSF12A</b> | NM_016639    | 4.61076  | 6.2E-11  | 2.602693 | 1.24E-08 |
| <b>SHCBP1</b>   | NM_024745    | 4.134201 | 1.91E-06 | 4.136634 | 3.11E-17 | <b>TNS4</b>      | NM_032865    | 2.411695 | 1.99E-05 | 4.143315 | 0.003855 |
| <b>SKP2</b>     | NM_001243120 | 3.162955 | 9.52E-08 | 2.013993 | 5.54E-07 | <b>TOP1MT</b>    | NM_001258446 | 2.135833 | 2.2E-07  | 2.008539 | 1.29E-08 |
| <b>SLAMF8</b>   | NM_020125    | 2.692191 | 5.69E-05 | 2.530798 | 3.6E-06  | <b>TOP2A</b>     | NM_001067    | 7.316677 | 9.58E-09 | 7.553393 | 2.76E-26 |
| <b>SLC12A8</b>  | NM_001195483 | 2.020391 | 4.61E-05 | 3.770903 | 5.31E-18 | <b>TPX2</b>      | NM_012112    | 5.998195 | 3.08E-09 | 7.804894 | 3.07E-27 |

|                 |              |          |          |          |          |               |              |          |          |          |          |
|-----------------|--------------|----------|----------|----------|----------|---------------|--------------|----------|----------|----------|----------|
| <b>SLC27A2</b>  | NM_001159629 | 2.219131 | 0.002824 | 2.987176 | 5.56E-06 | <b>TRIB3</b>  | NM_021158    | 4.462335 | 2.64E-07 | 3.239358 | 4.36E-05 |
| <b>SLC39A10</b> | NM_001127257 | 6.071806 | 9.71E-13 | 3.270419 | 3.56E-15 | <b>TRIM29</b> | NM_012101    | 4.831126 | 0.000114 | 3.044135 | 0.024307 |
| <b>SLC4A11</b>  | NM_001174089 | 2.163623 | 0.00033  | 6.708109 | 1.95E-07 | <b>TRIM59</b> | NM_173084    | 3.480883 | 1.62E-07 | 2.793015 | 5.64E-15 |
| <b>SLC5A6</b>   | NM_021095    | 2.914039 | 2.68E-08 | 2.472069 | 4.47E-15 | <b>TRIP13</b> | NM_001166260 | 5.729864 | 3.06E-10 | 5.302314 | 4.02E-15 |
| <b>SMC2</b>     | NM_001042550 | 2.706622 | 1.21E-07 | 2.179047 | 1.51E-13 | <b>TTF2</b>   | NM_003594    | 2.211342 | 2.7E-07  | 2.102979 | 1.2E-12  |
| <b>SMC4</b>     | NM_001002799 | 4.774077 | 1.22E-08 | 2.198603 | 1.21E-15 | <b>TTK</b>    | NM_001166691 | 3.476793 | 1.5E-06  | 8.07131  | 6.23E-16 |
| <b>SNRPD1</b>   | NM_001291916 | 2.475085 | 2.92E-09 | 2.091377 | 1.44E-11 | <b>TTYH3</b>  | NM_025250    | 2.171812 | 6.08E-07 | 3.476042 | 6.89E-25 |
| <b>SNX10</b>    | NM_001199835 | 6.708859 | 6.22E-14 | 3.768813 | 2.15E-13 | <b>TYMS</b>   | NM_001071    | 3.904704 | 1.5E-06  | 2.925891 | 2.37E-13 |
| <b>SOX4</b>     | NM_003107    | 2.157755 | 1.92E-06 | 3.617949 | 5.06E-24 | <b>UBE2C</b>  | NM_001281741 | 5.830752 | 4.83E-09 | 7.777198 | 2.22E-17 |
| <b>SPAG5</b>    | NM_006461    | 2.07964  | 3.45E-05 | 4.599277 | 3.66E-17 | <b>UBE2S</b>  | NM_014501    | 4.386306 | 2.34E-07 | 2.311105 | 1.24E-07 |
| <b>SPARC</b>    | NM_003118    | 4.443717 | 1.09E-11 | 2.59221  | 2.15E-13 | <b>UBE2T</b>  | NM_014176    | 4.397908 | 9.33E-10 | 4.19151  | 2.1E-14  |
| <b>SPC25</b>    | NM_020675    | 4.920783 | 6.97E-08 | 4.902079 | 7.37E-17 | <b>UHRF1</b>  | NM_001048201 | 2.985883 | 1.62E-07 | 5.735354 | 1.6E-15  |
| <b>SPP1</b>     | NM_000582    | 22.33105 | 7.47E-12 | 10.04125 | 3.7E-07  | <b>VCAN</b>   | NM_001126336 | 2.27073  | 6.13E-05 | 3.282164 | 2.27E-12 |
| <b>STAMBPL1</b> | NM_020799    | 2.711159 | 6.86E-08 | 2.18027  | 1.81E-08 | <b>VIL1</b>   | NM_007127    | 2.408168 | 0.040035 | 12.06078 | 1.63E-07 |
| <b>STAT1</b>    | NM_007315    | 2.116493 | 1.37E-06 | 2.170138 | 6.1E-13  | <b>WDHD1</b>  | NM_001008396 | 2.192082 | 1.5E-06  | 3.043404 | 7.34E-14 |
| <b>STIL</b>     | NM_001048166 | 3.894994 | 7.3E-11  | 5.877928 | 9.4E-19  | <b>WDR72</b>  | NM_001277176 | 12.13917 | 1.76E-06 | 11.77791 | 0.000571 |
| <b>STMN1</b>    | NM_001145454 | 2.632088 | 8.23E-08 | 2.059349 | 2.31E-12 | <b>XPO5</b>   | NM_020750    | 3.021366 | 8.21E-09 | 2.220044 | 7.1E-15  |
| <b>SULF1</b>    | NM_001128204 | 6.064707 | 2.01E-08 | 5.001276 | 2.28E-12 | <b>ZIC2</b>   | NM_007129    | 6.906656 | 4.98E-08 | 10.28338 | 8.3E-05  |
| <b>SUV39H2</b>  | NM_001193424 | 3.365931 | 1.78E-08 | 2.000737 | 5.71E-11 | <b>ZNF367</b> | NM_153695    | 2.816927 | 2.81E-06 | 2.841867 | 1.12E-13 |
| <b>TACC3</b>    | NM_006342    | 2.972641 | 9.87E-09 | 2.887771 | 9.48E-16 | <b>ZWILCH</b> | NM_001287821 | 3.293512 | 2.4E-07  | 2.810391 | 1.97E-19 |
| <b>TEAD4</b>    | NM_003213    | 2.703665 | 3.16E-10 | 2.761347 | 4.2E-14  |               |              |          |          |          |          |

| CO-DOWNREGULATION |              | GES13911    |          | TCGA-STAD   |          |          |                  | GES13911        |                 | TCGA-STAD       |                 |
|-------------------|--------------|-------------|----------|-------------|----------|----------|------------------|-----------------|-----------------|-----------------|-----------------|
| GENECARD          | RefSeq       | Fold Change | P-value  | Fold Change | P-value  | GeneCard | RefSeq           | Fold Change     | P-value         | Fold Change     | P-value         |
| AADAC             | NM_001086    | -8.31858    | 5.95E-09 | -3.34642    | 0.004212 | BEX4     | NM_001080425     | -2.13716        | 0.000439        | -3.56223        | 5.29E-22        |
| ABAT              | NM_000663    | -2.1599     | 0.006995 | -2.34964    | 3.51E-08 | BEX5     | NM_001012978     | -2.00597        | 0.000866        | -3.10366        | 7.35E-06        |
| ABCA8             | NM_001288985 | -13.1132    | 8.51E-11 | -11.2914    | 3.13E-26 | BNIP3    | NM_004052        | -3.42983        | 1.93E-05        | -2.71504        | 4.14E-12        |
| ABI3BP            | NM_015429    | -2.11941    | 0.006633 | -5.74518    | 3.26E-14 | C16orf89 | NM_001098514     | -15.9323        | 3.16E-12        | -22.6547        | 1.3E-44         |
| ACACB             | NM_001093    | -2.70331    | 3.32E-10 | -3.18054    | 8.82E-17 | C2orf40  | NM_032411        | -4.2101         | 3.3E-06         | -38.8418        | 2.43E-47        |
| ACE2              | NM_021804    | -2.46972    | 0.021968 | -3.54253    | 0.000238 | C6orf58  | NM_001010905     | -20.2959        | 1.27E-07        | -9.27765        | 5.2E-06         |
| ADAMTS1           | NM_006988    | -2.08559    | 0.000838 | -3.33594    | 4.87E-15 | C7       | NM_000587        | -2.42029        | 0.007957        | -11.3529        | 1.32E-15        |
| ADAMTS15          | NM_139055    | -2.48208    | 6.55E-08 | -3.14548    | 3.44E-08 | CA2      | NM_000067        | -7.67873        | 5.55E-07        | -2.47499        | 0.001866        |
| ADH1B             | NM_000668    | -7.86817    | 1.45E-07 | -16.9078    | 4.19E-30 | CACNA2D1 | NM_000722        | -2.21288        | 9.94E-05        | -2.28437        | 7.48E-05        |
| ADH1C             | NM_000669    | -12.4798    | 1.11E-08 | -3.57858    | 0.002187 | CAPN6    | NM_014289        | -2.16138        | 0.001555        | -2.62435        | 0.00262         |
| ADH4              | NM_000670    | -2.63191    | 0.027275 | -5.33086    | 6.95E-06 | CAPN9    | <b>NM_006615</b> | <b>-11.5379</b> | <b>3.37E-15</b> | <b>-3.14351</b> | <b>0.021873</b> |
| AFF3              | NM_001025108 | -2.90149    | 1.05E-05 | -6.8311     | 4.3E-29  | CBR1     | NM_001286789     | -2.20401        | 0.000239        | -3.94001        | 1.86E-28        |
| AGPAT9            | NM_001256421 | -4.46943    | 2.62E-08 | -3.58614    | 6.48E-18 | CCKBR    | NM_176875        | -11.5455        | 8.21E-10        | -20.4782        | 1.1E-22         |
| AKR1B10           | NM_020299    | -18.083     | 2.61E-08 | -8.302      | 1.07E-07 | CCL11    | NM_002986        | -2.75761        | 0.000752        | -2.05106        | 0.005667        |
| AKR1C1            | NM_001135241 | -7.70076    | 6.6E-12  | -8.83551    | 2.17E-24 | CCL14    | NM_004166        | -2.39644        | 0.000206        | -11.3338        | 7.71E-43        |
| AKR1C2            | NM_001135241 | -10.3085    | 1.14E-07 | -10.7309    | 2.08E-31 | CD36     | NM_000072        | -3.49605        | 1.11E-07        | -4.24641        | 3.91E-20        |
| AKR1C3            | NM_001253908 | -4.9491     | 0.00011  | -2.09832    | 0.002166 | CFD      | NM_001928        | -2.67943        | 1.11E-06        | -9.24585        | 3.58E-37        |
| ALDH1A1           | NM_000689    | -3.72657    | 5.62E-06 | -2.02869    | 0.006561 | CHGA     | NM_001275        | -26.167         | 2.03E-13        | -26.1404        | 3.95E-19        |
| ALDH3A1           | NM_000691    | -10.6771    | 1.8E-08  | -5.93609    | 2.11E-09 | CHIA     | NM_001040623     | -14.642         | 1.57E-06        | -8.91147        | 4.16E-15        |
| ALDH6A1           | NM_001278593 | -2.60907    | 8.68E-08 | -2.31264    | 1.24E-21 | CHRM3    | NM_000740        | -4.31226        | 3.38E-06        | -2.36645        | 2.63E-05        |
| ALDOB             | NM_000035    | -4.16009    | 0.001405 | -3.81058    | 0.001123 | CIDEB    | NM_014430        | -2.10953        | 0.00179         | -3.26995        | 6.95E-29        |
| ANKRD29           | NM_173505    | -2.65133    | 0.000166 | -2.88818    | 1.57E-09 | CIDEC    | NM_001199551     | -2.5532         | 0.000167        | -5.62872        | 2.24E-07        |
| APLP1             | NM_001024807 | -3.0495     | 1.23E-07 | -2.53312    | 0.000105 | CKB      | NM_001823        | -5.26041        | 1.37E-08        | -6.83082        | 1.03E-16        |
| APOA4             | NM_000482    | -2.0576     | 0.004696 | -23.7343    | 2.17E-12 | CKMT2    | NM_001099735     | -4.21653        | 2.11E-07        | -24.0069        | 2.49E-46        |

|                 |              |          |          |          |          |                  |              |          |          |          |          |
|-----------------|--------------|----------|----------|----------|----------|------------------|--------------|----------|----------|----------|----------|
| <b>APOB</b>     | NM_000384    | -3.29696 | 0.020458 | -15.2855 | 3.13E-15 | <b>CLCA1</b>     | NM_001285    | -7.10255 | 0.000315 | -13.6668 | 3.06E-09 |
| <b>APOBEC2</b>  | NM_006789    | -3.20627 | 3.8E-08  | -6.34746 | 1.08E-21 | <b>CLEC3B</b>    | NM_003278    | -3.40337 | 1.09E-06 | -11.2359 | 2.45E-69 |
| <b>APOD</b>     | NM_001647    | -2.71822 | 0.001149 | -3.07433 | 9.01E-05 | <b>CLU</b>       | NM_001831    | -4.03853 | 7.46E-05 | -4.012   | 1.14E-08 |
| <b>AQP4</b>     | NM_001650    | -35.7272 | 3.79E-10 | -37.6695 | 1.57E-44 | <b>COL4A5</b>    | NM_000495    | -3.68259 | 8.78E-09 | -5.06831 | 4.95E-16 |
| <b>ARHGEF37</b> | NM_001001669 | -3.81076 | 1.29E-09 | -3.41398 | 6.83E-24 | <b>CPA2</b>      | NM_001869    | -23.404  | 1.3E-09  | -15.293  | 7.25E-10 |
| <b>ATP4A</b>    | NM_000704    | -123.777 | 7.57E-13 | -59.0173 | 8.26E-20 | <b>CPA3</b>      | NM_001870    | -4.29192 | 5.42E-07 | -3.37921 | 2.52E-08 |
| <b>ATP4B</b>    | NM_000705    | -348.129 | 1.74E-14 | -55.7655 | 4.6E-22  | <b>CPE</b>       | NM_001873    | -3.26049 | 9.85E-05 | -4.12633 | 1.11E-16 |
| <b>B3GNT6</b>   | NM_138706    | -2.25353 | 8.45E-10 | -11.3305 | 1.97E-11 | <b>CSTA</b>      | NM_005213    | -4.08637 | 2.91E-06 | -5.35791 | 1.92E-13 |
| <b>BEX2</b>     | NM_001168399 | -2.91545 | 0.000263 | -6.30129 | 1E-11    | <b>CWH43</b>     | NM_001286791 | -7.06837 | 4.99E-11 | -63.8313 | 8.54E-45 |
| <b>CXCL12</b>   | NM_000609    | -2.75112 | 0.002649 | -3.23928 | 3.34E-12 | <b>FAM189A2</b>  | NM_001127608 | -3.47232 | 4.81E-08 | -5.28456 | 1.88E-14 |
| <b>CXCL14</b>   | NM_004887    | -4.34174 | 2.61E-05 | -3.18743 | 3.86E-05 | <b>FAM3B</b>     | NM_058186    | -15.626  | 1.74E-08 | -3.90674 | 0.000224 |
| <b>CXCL17</b>   | NM_198477    | -13.0187 | 6.61E-09 | -7.5035  | 1.05E-07 | <b>FCGBP</b>     | NM_003890    | -14.7897 | 6.48E-09 | -2.89605 | 0.00283  |
| <b>CYBRD1</b>   | NM_001127383 | -2.12458 | 0.000488 | -3.42737 | 2.07E-12 | <b>FHL1</b>      | NM_001159699 | -2.99677 | 1.36E-05 | -8.45654 | 7.91E-19 |
| <b>CYP2C18</b>  | NM_000772    | -7.74588 | 3.83E-07 | -2.90239 | 0.003397 | <b>FRMD3</b>     | NM_001244959 | -2.04089 | 0.000228 | -2.48449 | 2.9E-07  |
| <b>CYP3A4</b>   | NM_001202855 | -2.96949 | 0.000127 | -8.03134 | 3.03E-08 | <b>GABARAPL1</b> | NM_031412    | -2.16936 | 7.31E-06 | -2.24952 | 3.09E-13 |
| <b>CYP4F12</b>  | NM_023944    | -2.78495 | 1.68E-06 | -3.00789 | 5.38E-05 | <b>GATA5</b>     | NM_080473    | -2.15803 | 1.16E-06 | -4.30451 | 0.001311 |
| <b>DEFA5</b>    | NM_021010    | -10.3345 | 0.000515 | -23.4977 | 1.75E-13 | <b>GBA3</b>      | NM_001128432 | -3.5258  | 0.015182 | -4.63224 | 5.32E-05 |
| <b>DEFA6</b>    | NM_001926    | -8.03334 | 0.000369 | -11.8881 | 7.07E-09 | <b>GCNT2</b>     | NM_001491    | -5.04706 | 5.67E-09 | -2.51784 | 1.04E-09 |
| <b>DEFB4A</b>   | NM_001205266 | -4.95531 | 8.3E-07  | -6.3077  | 7.99E-09 | <b>GDPD3</b>     | NM_024307    | -3.63968 | 1.11E-05 | -3.03927 | 8.69E-08 |
| <b>DHRS7</b>    | NM_016029    | -2.46798 | 1.59E-08 | -2.10627 | 1.99E-15 | <b>GGT6</b>      | NM_001122890 | -2.136   | 0.010347 | -3.47778 | 0.001244 |
| <b>DHRS9</b>    | NM_001142270 | -2.38535 | 0.003003 | -3.07841 | 1.6E-05  | <b>GHRL</b>      | NM_001134941 | -10.7241 | 3.48E-10 | -7.76167 | 1.63E-11 |
| <b>DISP1</b>    | NM_032890    | -2.27532 | 8.48E-08 | -2.10972 | 3.27E-17 | <b>GIF</b>       | NM_005142    | -340.593 | 9.29E-14 | -17.9699 | 4.17E-08 |
| <b>DMD</b>      | NM_000109    | -3.81954 | 1.39E-07 | -3.73537 | 2.32E-13 | <b>GKN1</b>      | NM_019617    | -60.8172 | 2.25E-08 | -107.57  | 3.71E-23 |
| <b>DNER</b>     | NM_139072    | -5.01365 | 3.49E-05 | -12.4718 | 1.4E-21  | <b>GKN2</b>      | NM_182536    | -78.8457 | 1.16E-09 | -63.3942 | 3.28E-19 |
| <b>DPCR1</b>    | NM_080870    | -18.3119 | 2.93E-07 | -6.10049 | 3.24E-05 | <b>GLUL</b>      | NM_001033044 | -2.45837 | 0.000318 | -2.04787 | 1.18E-13 |
| <b>DPT</b>      | NM_001937    | -4.28776 | 1.17E-07 | -23.6541 | 5.85E-61 | <b>GNG7</b>      | NM_052847    | -2.53433 | 1.06E-07 | -7.16059 | 1.24E-50 |

|                |              |          |          |          |          |                |              |          |          |          |          |
|----------------|--------------|----------|----------|----------|----------|----------------|--------------|----------|----------|----------|----------|
| <b>DUOX1</b>   | NM_017434    | -2.69015 | 6.29E-05 | -2.43867 | 0.000502 | <b>GPDIL</b>   | NM_015141    | -2.64304 | 5.49E-11 | -2.03648 | 2.27E-14 |
| <b>DUOXA2</b>  | NM_207581    | -3.9807  | 1.88E-07 | -2.73483 | 0.04896  | <b>GPR155</b>  | NM_001033045 | -17.5528 | 1.31E-09 | -3.5787  | 4.42E-18 |
| <b>DUSP5</b>   | NM_004419    | -2.0999  | 0.003647 | -3.2379  | 1.85E-16 | <b>GPR64</b>   | NM_001079858 | -5.0085  | 1.21E-08 | -3.31015 | 3.05E-08 |
| <b>ECHDC2</b>  | NM_001198961 | -2.20551 | 1.11E-06 | -2.42885 | 3.47E-15 | <b>GPX3</b>    | NM_002084    | -5.48352 | 1.42E-08 | -7.75411 | 3.16E-33 |
| <b>EDIL3</b>   | NM_001278642 | -2.06806 | 8.95E-05 | -2.14931 | 1.53E-07 | <b>GSTA1</b>   | NM_145740    | -6.00365 | 3.1E-07  | -4.18689 | 0.002556 |
| <b>EGLN3</b>   | NM_022073    | -2.00798 | 0.001223 | -2.00931 | 4.15E-08 | <b>GSTA4</b>   | NM_001512    | -3.14828 | 7.13E-06 | -2.34866 | 2.72E-11 |
| <b>ELL2</b>    | NM_012081    | -2.82273 | 6.68E-10 | -2.63163 | 1.01E-21 | <b>HADH</b>    | NM_001184705 | -2.23127 | 6.16E-10 | -2.11484 | 3.41E-18 |
| <b>ENTPD3</b>  | NM_001248    | -2.19021 | 0.000522 | -7.68791 | 7.3E-22  | <b>HHIP</b>    | NM_022475    | -6.51118 | 3.61E-11 | -2.27129 | 0.024363 |
| <b>ENTPD5</b>  | NM_001249    | -2.80053 | 5.33E-07 | -2.13352 | 4.2E-08  | <b>HOMER2</b>  | NM_004839    | -3.5011  | 2.96E-07 | -6.39411 | 1.35E-15 |
| <b>ESRRG</b>   | NM_001134285 | -50.7001 | 1.62E-12 | -20.6028 | 1.82E-40 | <b>HPGD</b>    | NM_000860    | -13.1148 | 3.03E-09 | -8.42964 | 7.85E-20 |
| <b>ETFDH</b>   | NM_001281737 | -2.65619 | 2.47E-11 | -2.43848 | 1.76E-24 | <b>HSD17B6</b> | NM_003725    | -2.12479 | 0.000319 | -2.7629  | 7.69E-12 |
| <b>EYA2</b>    | NM_005244    | -2.98154 | 1.25E-05 | -3.5624  | 3.04E-05 | <b>HSPB8</b>   | NM_014365    | -2.00496 | 0.000712 | -8.79613 | 1.04E-26 |
| <b>F13A1</b>   | NM_000129    | -3.90991 | 1.54E-06 | -4.44138 | 1.15E-12 | <b>ID3</b>     | NM_002167    | -2.08693 | 5.97E-07 | -2.06508 | 3.55E-11 |
| <b>FABP4</b>   | NM_001442    | -4.23952 | 0.000312 | -10.9664 | 1.64E-28 | <b>ID4</b>     | NM_001546    | -6.91243 | 1.77E-10 | -3.92844 | 5.84E-25 |
| <b>FAM107A</b> | NM_001076778 | -4.02207 | 4.17E-09 | -7.06156 | 7.52E-43 | <b>IGFBP2</b>  | NM_000597    | -7.34569 | 5.5E-07  | -2.65053 | 6.08E-05 |
| <b>FAM117A</b> | NM_030802    | -2.24983 | 9.39E-06 | -2.72935 | 2.78E-19 | <b>IGJ</b>     | NM_144646    | -4.1174  | 1.3E-07  | -4.82787 | 2.59E-06 |
| <b>FAM13A</b>  | NM_001015045 | -2.38213 | 1.72E-07 | -2.01719 | 5.33E-08 | <b>IL33</b>    | NM_001199640 | -2.70072 | 4.02E-05 | -2.50953 | 5.1E-06  |
| <b>FAM149A</b> | NM_001006655 | -2.05322 | 0.00018  | -3.11301 | 4.44E-13 | <b>IPW</b>     | NR_001293    | -2.27418 | 0.000143 | -3.52638 | 1.83E-15 |
| <b>IRX3</b>    | NM_024336    | -7.71685 | 4.25E-11 | -4.59295 | 4.45E-10 | <b>MGAM</b>    | NM_004668    | -3.65687 | 1.81E-06 | -3.11321 | 0.000207 |
| <b>ITGA8</b>   | NM_001291494 | -2.27348 | 0.000111 | -4.97686 | 3.79E-17 | <b>MICALL1</b> | NM_033386    | -2.13006 | 7.77E-07 | -2.4273  | 3.27E-21 |
| <b>ITM2A</b>   | NM_001171581 | -2.75877 | 7.05E-05 | -3.06986 | 1.21E-14 | <b>MRAP2</b>   | NM_138409    | -4.53033 | 4.91E-09 | -2.34544 | 0.002534 |
| <b>JAM2</b>    | NM_001270407 | -2.09847 | 9.26E-06 | -4.25087 | 1.19E-24 | <b>MT1E</b>    | NM_175617    | -2.85402 | 3.33E-07 | -2.9049  | 5.81E-08 |
| <b>KAT2B</b>   | NM_003884    | -2.05588 | 1.26E-06 | -3.08241 | 6.26E-29 | <b>MT1G</b>    | NM_005950    | -3.5684  | 9.5E-10  | -3.29383 | 1.44E-05 |
| <b>KCNE2</b>   | NM_172201    | -44.7496 | 1.12E-12 | -8.63302 | 1.3E-11  | <b>MT1M</b>    | NM_176870    | -14.1869 | 1.75E-11 | -8.40764 | 8.9E-19  |
| <b>KCNJ15</b>  | NM_001276435 | -8.79313 | 1.17E-08 | -4.17348 | 3.27E-09 | <b>MT1X</b>    | NM_005952    | -2.1321  | 4.66E-06 | -3.41896 | 6.72E-21 |
| <b>KCNJ16</b>  | NM_001270422 | -31.8379 | 1.35E-12 | -6.30225 | 5.79E-08 | <b>MT2A</b>    | NM_005953    | -2.02779 | 9.81E-07 | -2.46336 | 1.72E-09 |

|                  |              |          |          |          |          |                |              |          |          |          |          |
|------------------|--------------|----------|----------|----------|----------|----------------|--------------|----------|----------|----------|----------|
| <b>KIT</b>       | NM_000222    | -4.99752 | 5.09E-11 | -4.51202 | 2.65E-19 | <b>MTTP</b>    | NM_000253    | -3.06604 | 0.043149 | -10.7787 | 7.47E-12 |
| <b>KLF15</b>     | NM_014079    | -2.09977 | 1.15E-05 | -8.02801 | 1.57E-28 | <b>MYH11</b>   | NM_001040113 | -2.87074 | 0.000394 | -14.2578 | 2.94E-11 |
| <b>KLF2</b>      | NM_016270    | -2.78586 | 5.67E-07 | -2.82634 | 2.88E-11 | <b>MYRIP</b>   | NM_001284423 | -10.3821 | 1.52E-09 | -6.17162 | 4.56E-19 |
| <b>KLF4</b>      | NM_004235    | -3.83427 | 9.16E-08 | -3.58743 | 2.32E-18 | <b>NEGR1</b>   | NM_173808    | -2.79674 | 2.52E-06 | -5.38288 | 7.23E-24 |
| <b>KLF9</b>      | NM_001206    | -2.33939 | 3.64E-06 | -2.89866 | 2.31E-15 | <b>NR3C1</b>   | NM_000176    | -2.1062  | 0.000232 | -2.03177 | 7.72E-10 |
| <b>KLK11</b>     | NM_001136032 | -9.85015 | 9.97E-09 | -2.52663 | 0.049939 | <b>NR3C2</b>   | NM_000901    | -2.84252 | 1.33E-05 | -2.76411 | 5.73E-12 |
| <b>KRT20</b>     | NM_019010    | -16.5946 | 6.36E-07 | -5.93315 | 0.000292 | <b>OGN</b>     | NM_014057    | -2.08347 | 0.04322  | -5.79552 | 4.28E-11 |
| <b>LAMA2</b>     | NM_000426    | -2.63415 | 1.04E-07 | -2.15121 | 1.8E-05  | <b>OTC</b>     | NM_000531    | -2.60634 | 0.011989 | -5.6073  | 4.74E-05 |
| <b>LEAP2</b>     | NM_052971    | -2.30216 | 0.001586 | -2.13574 | 0.000571 | <b>OXCT1</b>   | NM_000436    | -2.76985 | 1.48E-05 | -2.11446 | 5.83E-07 |
| <b>LEPR</b>      | NM_001003679 | -5.76493 | 3.49E-08 | -2.02037 | 7.81E-08 | <b>P2RY14</b>  | NM_001081455 | -2.61464 | 5.95E-05 | -5.81074 | 4.95E-37 |
| <b>LEPREL1</b>   | NM_001134418 | -3.02898 | 6.28E-06 | -3.51828 | 9.7E-14  | <b>PAIP2B</b>  | NM_020459    | -2.8792  | 3.53E-06 | -4.32148 | 6.11E-18 |
| <b>LIFR</b>      | NM_001127671 | -7.57047 | 1.51E-08 | -3.37839 | 5.88E-12 | <b>PBX1</b>    | NM_001204961 | -2.32623 | 0.00112  | -2.59917 | 7.22E-11 |
| <b>LIMCH1</b>    | NM_001112717 | -2.74479 | 6.7E-06  | -2.00539 | 8.37E-08 | <b>PDK4</b>    | NM_002612    | -3.81836 | 1.34E-05 | -7.31146 | 1.07E-16 |
| <b>LIPF</b>      | NM_001198828 | -107.27  | 1.31E-10 | -34.4752 | 1.91E-12 | <b>PDZD2</b>   | NM_015022    | -2.12794 | 2.49E-06 | -2.35945 | 2.08E-11 |
| <b>LOC400043</b> | NR_026656    | -7.34448 | 7.33E-08 | -2.57374 | 2.36E-05 | <b>PER3</b>    | NM_001289861 | -3.46945 | 1.27E-11 | -2.3882  | 2.44E-10 |
| <b>LTF</b>       | NM_001199149 | -31.8009 | 1.25E-09 | -4.17168 | 0.000522 | <b>PGC</b>     | NM_001166424 | -38.4841 | 5.88E-08 | -3.77718 | 0.026942 |
| <b>MAL</b>       | NM_002371    | -13.6318 | 1.81E-14 | -73.6867 | 1.12E-77 | <b>PGM5</b>    | NM_021965    | -2.17237 | 0.000412 | -12.2035 | 7.33E-27 |
| <b>MAMDC2</b>    | NM_153267    | -4.00006 | 5.76E-08 | -22.0044 | 5.79E-54 | <b>PIK3C2G</b> | NM_001288772 | -7.55981 | 1.6E-10  | -4.19919 | 0.002435 |
| <b>MAOA</b>      | NM_000240    | -2.40546 | 0.003705 | -3.7122  | 6.22E-13 | <b>PPP2R3A</b> | NM_001190447 | -3.29698 | 2.78E-08 | -2.87041 | 1.55E-15 |
| <b>MAOB</b>      | NM_000898    | -2.47136 | 0.000217 | -5.18117 | 2.48E-15 | <b>PRIMA1</b>  | NM_178004    | -3.00878 | 6.85E-08 | -18.7365 | 4.68E-41 |
| <b>MAP7D2</b>    | NM_001168465 | -4.73573 | 5.58E-10 | -6.0478  | 2.54E-08 | <b>PRKAR2B</b> | NM_002736    | -2.2776  | 0.000607 | -3.82148 | 6.23E-21 |
| <b>ME1</b>       | NM_002395    | -2.85637 | 3.22E-05 | -2.73956 | 1.32E-12 | <b>PSAPL1</b>  | NM_001085382 | -5.56235 | 6.55E-11 | -8.16771 | 4.44E-07 |
| <b>MEP1B</b>     | NM_005925    | -3.05428 | 0.001976 | -7.59806 | 1.26E-08 | <b>PSCA</b>    | NM_005672    | -27.5569 | 1.55E-08 | -15.0785 | 1.27E-10 |
| <b>METTL7A</b>   | NM_014033    | -5.89796 | 4.32E-09 | -3.89504 | 1.07E-20 | <b>PTGER3</b>  | NM_000957    | -4.35027 | 6.14E-06 | -3.31149 | 6.65E-10 |
| <b>MFAP4</b>     | NM_001198695 | -2.36524 | 0.003092 | -4.89536 | 3.35E-12 | <b>PTGR1</b>   | NM_001146108 | -2.54201 | 6.09E-06 | -3.42398 | 7.74E-22 |
| <b>MFAP5</b>     | NM_003480    | -3.26845 | 0.000181 | -3.57639 | 1.72E-09 | <b>PTGS1</b>   | NM_000962    | -2.04548 | 1.12E-07 | -4.28324 | 2.05E-26 |

|                 |              |          |          |          |          |                 |              |          |          |          |          |
|-----------------|--------------|----------|----------|----------|----------|-----------------|--------------|----------|----------|----------|----------|
| <b>MFSD4</b>    | NM_181644    | -37.1663 | 5.38E-12 | -2.4867  | 0.001262 | <b>PTPRS</b>    | NM_002850    | -2.4842  | 4.42E-09 | -3.03852 | 2.39E-10 |
| <b>PTPRZ1</b>   | NM_001206838 | -7.0904  | 2.07E-07 | -7.64456 | 5.86E-17 | <b>SOX2</b>     | NM_003106    | -3.51156 | 5.16E-06 | -5.58148 | 1.22E-09 |
| <b>RAB30</b>    | NM_001286059 | -2.56892 | 2.77E-07 | -2.75484 | 2.04E-18 | <b>SPAG16</b>   | NM_001025436 | -4.79659 | 8.55E-07 | -3.02148 | 2.57E-13 |
| <b>RAI2</b>     | NM_001172732 | -2.67528 | 2.07E-06 | -3.06995 | 1.9E-14  | <b>SRPX</b>     | NM_001170750 | -3.29552 | 1.33E-05 | -4.7241  | 1.97E-23 |
| <b>RBP2</b>     | NM_004164    | -3.09277 | 0.018144 | -12.2826 | 7.13E-09 | <b>SST</b>      | NM_001048    | -22.2206 | 2.71E-11 | -20.2492 | 9.7E-16  |
| <b>RCAN2</b>    | NM_001251973 | -3.28312 | 8.46E-08 | -3.58299 | 7.32E-19 | <b>SYNPO2</b>   | NM_001128933 | -3.24423 | 0.000372 | -7.87079 | 3.35E-10 |
| <b>RDH12</b>    | NM_152443    | -6.9514  | 6.83E-10 | -13.5532 | 2.55E-29 | <b>SYTL5</b>    | NM_001163334 | -10.3631 | 5.04E-12 | -2.76633 | 0.00332  |
| <b>REG3A</b>    | NM_002580    | -25.6101 | 2.27E-08 | -8.97833 | 0.00013  | <b>TCEA3</b>    | NM_003196    | -2.71173 | 0.00035  | -2.4568  | 3E-06    |
| <b>RGMB</b>     | NM_001012761 | -3.65941 | 8.56E-08 | -2.59025 | 1.09E-14 | <b>TCEAL3</b>   | NM_001006933 | -2.20058 | 8.42E-05 | -2.23694 | 1.38E-12 |
| <b>RGN</b>      | NM_001282848 | -2.092   | 0.002106 | -5.4689  | 6.79E-14 | <b>TEF</b>      | NM_001145398 | -2.02164 | 1.43E-08 | -2.76956 | 1.27E-24 |
| <b>RNASE1</b>   | NM_002933    | -5.15942 | 1.22E-09 | -3.09751 | 1.41E-10 | <b>TFF2</b>     | NM_005423    | -9.06992 | 1.03E-06 | -4.47006 | 0.00663  |
| <b>ROR1</b>     | NM_001083592 | -2.51681 | 8.6E-05  | -2.18915 | 9.26E-09 | <b>TLE4</b>     | NM_001282748 | -2.2072  | 6.49E-06 | -2.45557 | 3.56E-17 |
| <b>RORA</b>     | NM_002943    | -2.28235 | 0.000374 | -2.13694 | 2.58E-11 | <b>TLR3</b>     | NM_003265    | -2.33818 | 0.000925 | -2.62947 | 1.75E-11 |
| <b>SCARA5</b>   | NM_173833    | -5.56913 | 1.39E-09 | -23.3207 | 3.56E-54 | <b>TMEM100</b>  | NM_001099640 | -6.55994 | 2.73E-11 | -12.3918 | 3.74E-40 |
| <b>SCGB2A1</b>  | NM_002407    | -16.7182 | 9.11E-13 | -7.50493 | 2.4E-07  | <b>TMEM220</b>  | NM_001004313 | -4.52038 | 1.2E-11  | -3.23653 | 3.28E-20 |
| <b>SCIN</b>     | NM_001112706 | -6.49708 | 3.48E-07 | -3.85196 | 5.16E-09 | <b>TMEM27</b>   | NM_020665    | -3.27391 | 8.18E-09 | -2.13332 | 1.35E-05 |
| <b>SCNN1G</b>   | NM_001039    | -5.24863 | 9.75E-07 | -23.3364 | 1.96E-27 | <b>TMEM37</b>   | NM_183240    | -2.52746 | 3.13E-07 | -2.18497 | 5.46E-06 |
| <b>SDPR</b>     | NM_004657    | -2.75956 | 2.58E-05 | -3.86266 | 3.02E-17 | <b>TMPRSS15</b> | NM_002772    | -4.68941 | 0.007099 | -14.7849 | 1.31E-11 |
| <b>SELENBP1</b> | NM_001258288 | -4.16363 | 5.3E-07  | -2.5674  | 1.12E-09 | <b>TNFRSF17</b> | NM_001192    | -10.1114 | 9.31E-10 | -2.68933 | 0.006576 |
| <b>SETBP1</b>   | NM_001130110 | -2.29056 | 1.27E-06 | -3.07632 | 6E-13    | <b>TOX</b>      | NM_014729    | -2.79659 | 4.66E-05 | -3.07574 | 8.64E-11 |
| <b>SFRP1</b>    | NM_003012    | -2.14131 | 0.001461 | -15.8511 | 8.61E-35 | <b>TPD52L1</b>  | NM_001003395 | -3.16588 | 0.000259 | -3.42094 | 9.36E-09 |
| <b>SGK1</b>     | NM_001143676 | -2.60043 | 9.78E-11 | -2.05527 | 9.67E-09 | <b>TPH1</b>     | NM_004179    | -5.48383 | 4.52E-08 | -2.92853 | 0.00046  |
| <b>SIDT2</b>    | NM_001040455 | -2.76201 | 5.93E-11 | -2.01881 | 1.2E-16  | <b>TPSAB1</b>   | NM_003294    | -3.18486 | 2.19E-05 | -3.5427  | 3.52E-09 |
| <b>SLAIN1</b>   | NM_001040153 | -3.26485 | 2.08E-05 | -2.05507 | 0.000143 | <b>TPSB2</b>    | NM_024164    | -2.8879  | 8.01E-05 | -3.60521 | 2.89E-09 |
| <b>SLC16A7</b>  | NM_001270622 | -6.67104 | 1.4E-08  | -3.62867 | 2.18E-12 | <b>TSC22D3</b>  | NM_001015881 | -2.75225 | 2.12E-05 | -3.54073 | 7.33E-19 |
| <b>SLC25A4</b>  | NM_001151    | -2.33397 | 2.03E-06 | -3.68267 | 4.22E-25 | <b>UBE2QL1</b>  | NM_001145161 | -4.21417 | 1.18E-07 | -5.5726  | 1.35E-23 |



|                |              |          |          |          |          |               |              |          |          |          |          |
|----------------|--------------|----------|----------|----------|----------|---------------|--------------|----------|----------|----------|----------|
| <b>SLC26A7</b> | NM_001282356 | -7.72837 | 3.07E-08 | -2.00072 | 0.014573 | <b>UPK1B</b>  | NM_006952    | -2.99533 | 0.004618 | -6.28298 | 2E-05    |
| <b>SLC28A2</b> | NM_004212    | -2.62773 | 0.017131 | -5.97838 | 0.000233 | <b>VLDLR</b>  | NM_001018056 | -2.12708 | 1.41E-05 | -3.43796 | 2.1E-13  |
| <b>SLC2A12</b> | NM_145176    | -4.47873 | 6.17E-07 | -3.17161 | 3.06E-15 | <b>VSIG2</b>  | NM_014312    | -15.4196 | 8.95E-11 | -3.57679 | 0.001298 |
| <b>SLC7A8</b>  | NM_001267036 | -3.99142 | 2.18E-11 | -3.26641 | 2.84E-16 | <b>WFDC1</b>  | NM_001282466 | -2.4006  | 0.000178 | -2.86406 | 5.16E-13 |
| <b>SMAD9</b>   | NM_001127217 | -4.16132 | 8.6E-08  | -3.48219 | 3.81E-12 | <b>WIPF3</b>  | NM_001080529 | -3.31417 | 7.97E-07 | -2.41684 | 9.96E-05 |
| <b>SNRPN</b>   | NM_003097    | -2.57375 | 3.94E-06 | -3.8849  | 2.59E-23 | <b>XK</b>     | NM_021083    | -3.17431 | 1.64E-05 | -2.05408 | 0.000281 |
| <b>SOBP</b>    | NM_018013    | -2.26129 | 2.53E-05 | -2.78007 | 8.17E-13 | <b>ZBTB7C</b> | NM_001039360 | -3.94262 | 1.96E-09 | -4.92124 | 8.4E-12  |
| <b>SORBS1</b>  | NM_001034954 | -3.25029 | 9.24E-05 | -4.51225 | 5.94E-11 | <b>ZG16</b>   | NM_152338    | -2.71276 | 0.006832 | -7.43114 | 2.73E-08 |
| <b>SORBS2</b>  | NM_001145670 | -3.0045  | 7.34E-09 | -3.90647 | 5.41E-15 |               |              |          |          |          |          |
| <b>SOSTDC1</b> | NM_015464    | -32.5967 | 5.75E-12 | -23.8444 | 4.59E-41 |               |              |          |          |          |          |

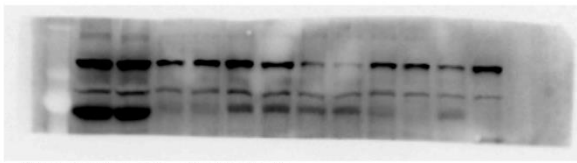

Sup-figure 1b. Calpain-8

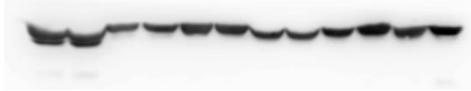

Sup-figure 1b.  $\beta$ -Actin

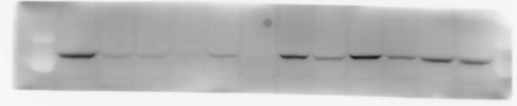

Sup-figure 1b. Calpain-9

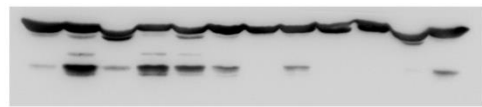

Sup-figure 1b.  $\beta$ -Actin

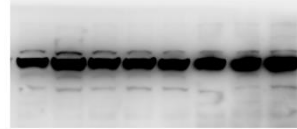

Sup-figure 1d. Calpain-8

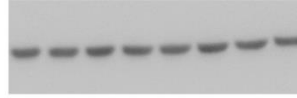

Sup-figure 1d.  $\beta$ -Actin

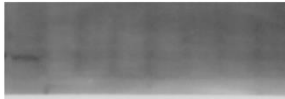

Sup-figure 1d. Calpain-9

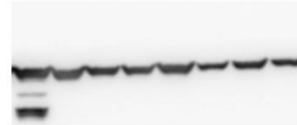

Sup-figure 1d.  $\beta$ -Actin

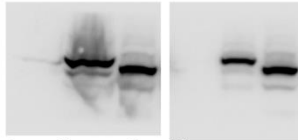

Sup-figure 2a. Flag

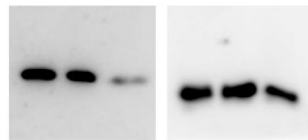

Sup-figure 2d. CDK4

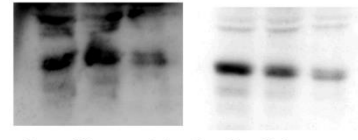

Sup-figure 2d. Cyclin D1

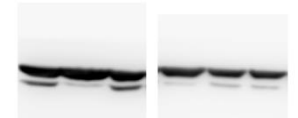

Sup-figure 2a. GAPDH

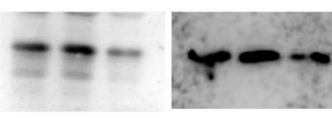

Sup-figure 2d. CDK6

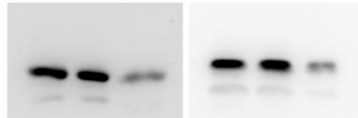

Sup-figure 2d. Cyclin D3

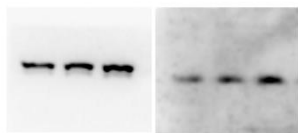

Sup-figure 2d. p21

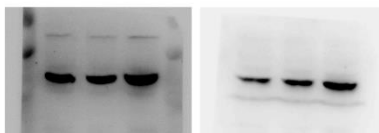

Sup-figure 2f. cleaved & Caspase12

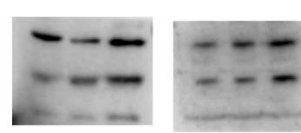

Sup-figure 2f. Cleaved Caspase9

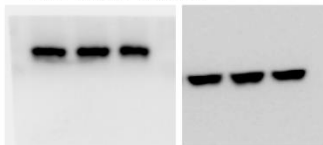

Sup-figure 2d. GAPDH

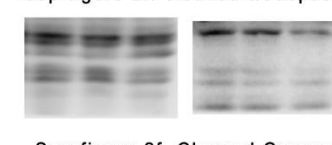

Sup-figure 2f. Cleaved Caspase8

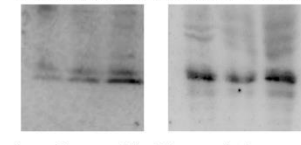

Sup-figure 2f. Cleaved Caspase3

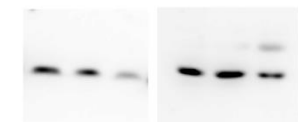

Sup-figure 2f. Bcl-2

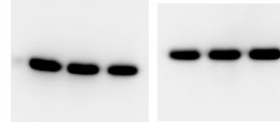

Sup-figure 2f. GAPDH

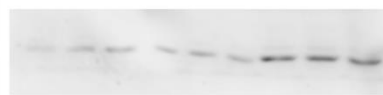

Sup-figure 3c. Cleaved Caspase12

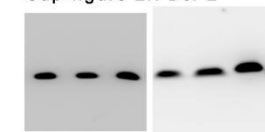

Sup-figure 2f. Bax

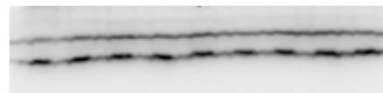

Sup-figure 3c. B-actin
